# Supplementary material for: Metabolic View on Human Healthspan: A Lipidome-Wide Association Study
Source: MDPI journal article supplement (doi:10.3390/metabo11050287), 2021-04-30
Supplement: s1 [file s1]

Age

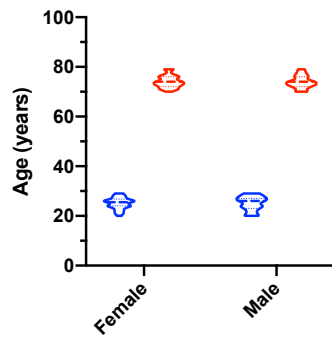

Body mass

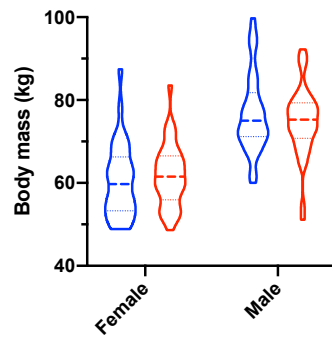

Percentage of body fat

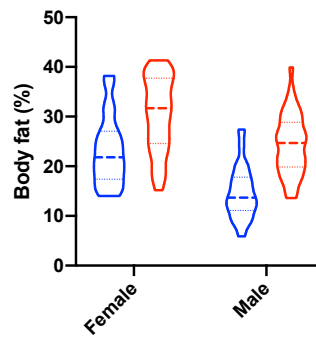

Body max index (BMI)

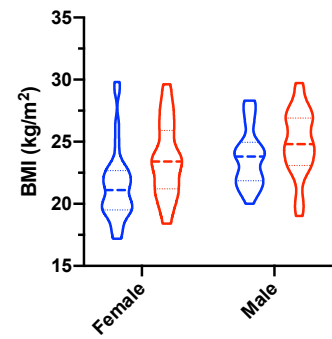

young  
aged

Systolic blood pressure

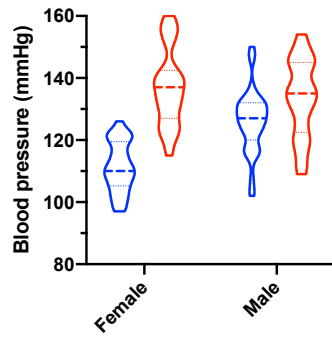

Diastolic blood pressure

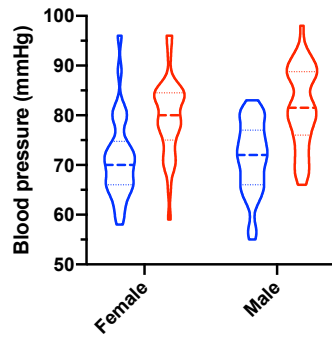

Fasting time

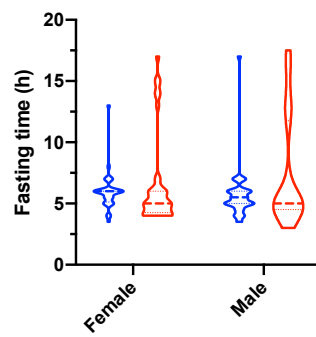

Glycated hemoglobin

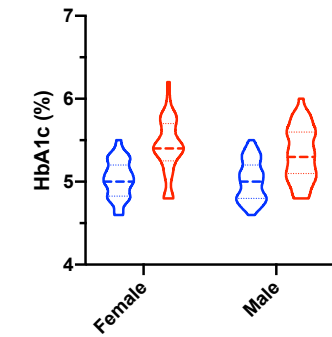

young  
aged

Total cholesterol

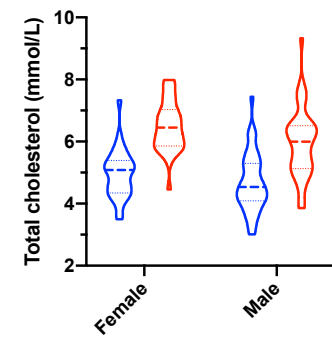

HDL-cholesterol

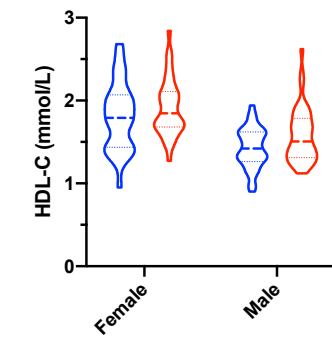

LDL-cholesterol

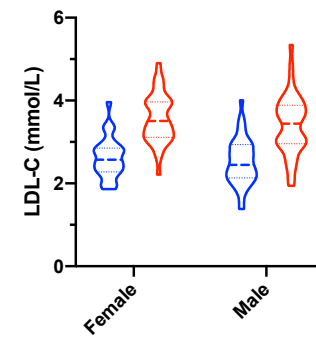

Triglycerides

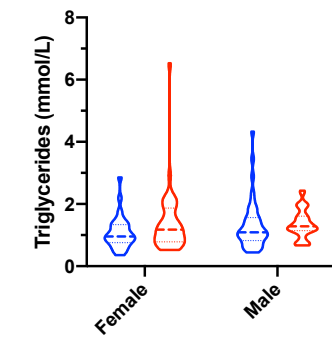

young  
aged

Total daily physical activity

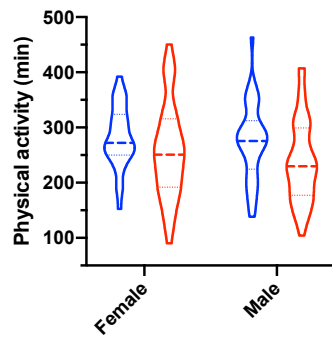

Moderate-vigorous physical activity

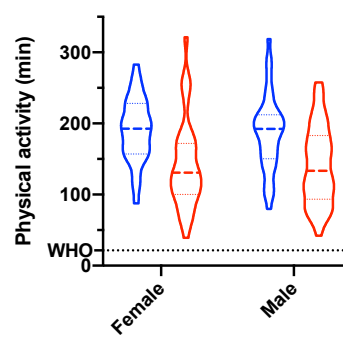

young  
aged
