# Supplementary material for: Metabolic View on Human Healthspan: A Lipidome-Wide Association Study
Source: MDPI journal article supplement (doi:10.3390/metabo11050287), 2021-04-30

## A) Glycerolipids and cholesterol esters

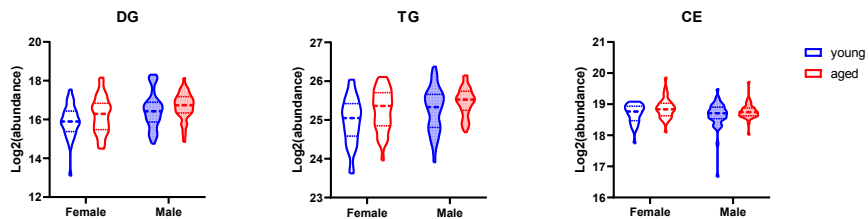

## B) Glycerophosphocholines and glycerophosphoinositols

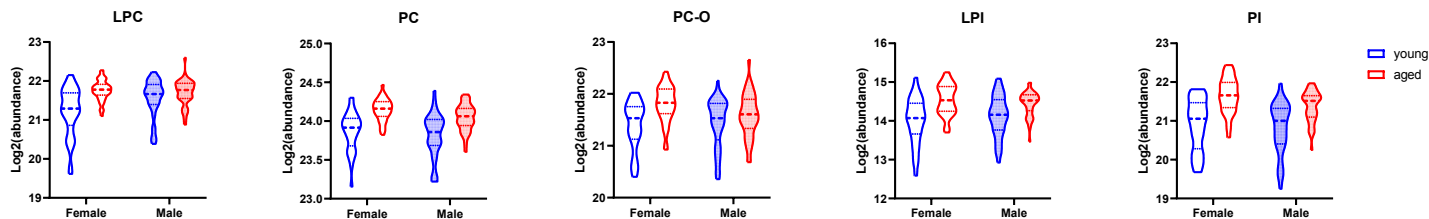

## C) Glycerophosphoethanolamines

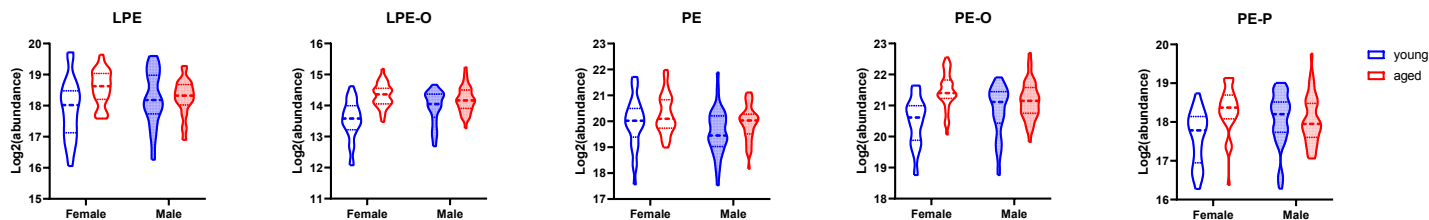

## D) Sphingolipids

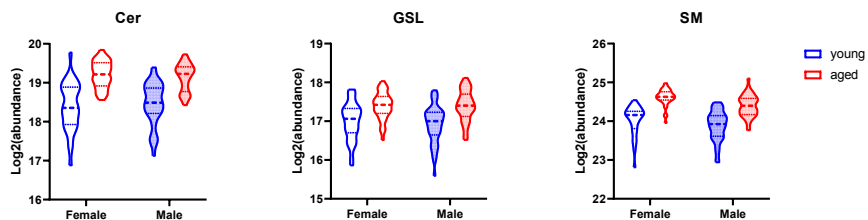

Supplement: s1 [file s1]
