# Supplementary figures and images for: Metabolic View on Human Healthspan: A Lipidome-Wide Association Study
Source: MDPI journal article supplement (doi:10.3390/metabo11050287), 2021-04-30

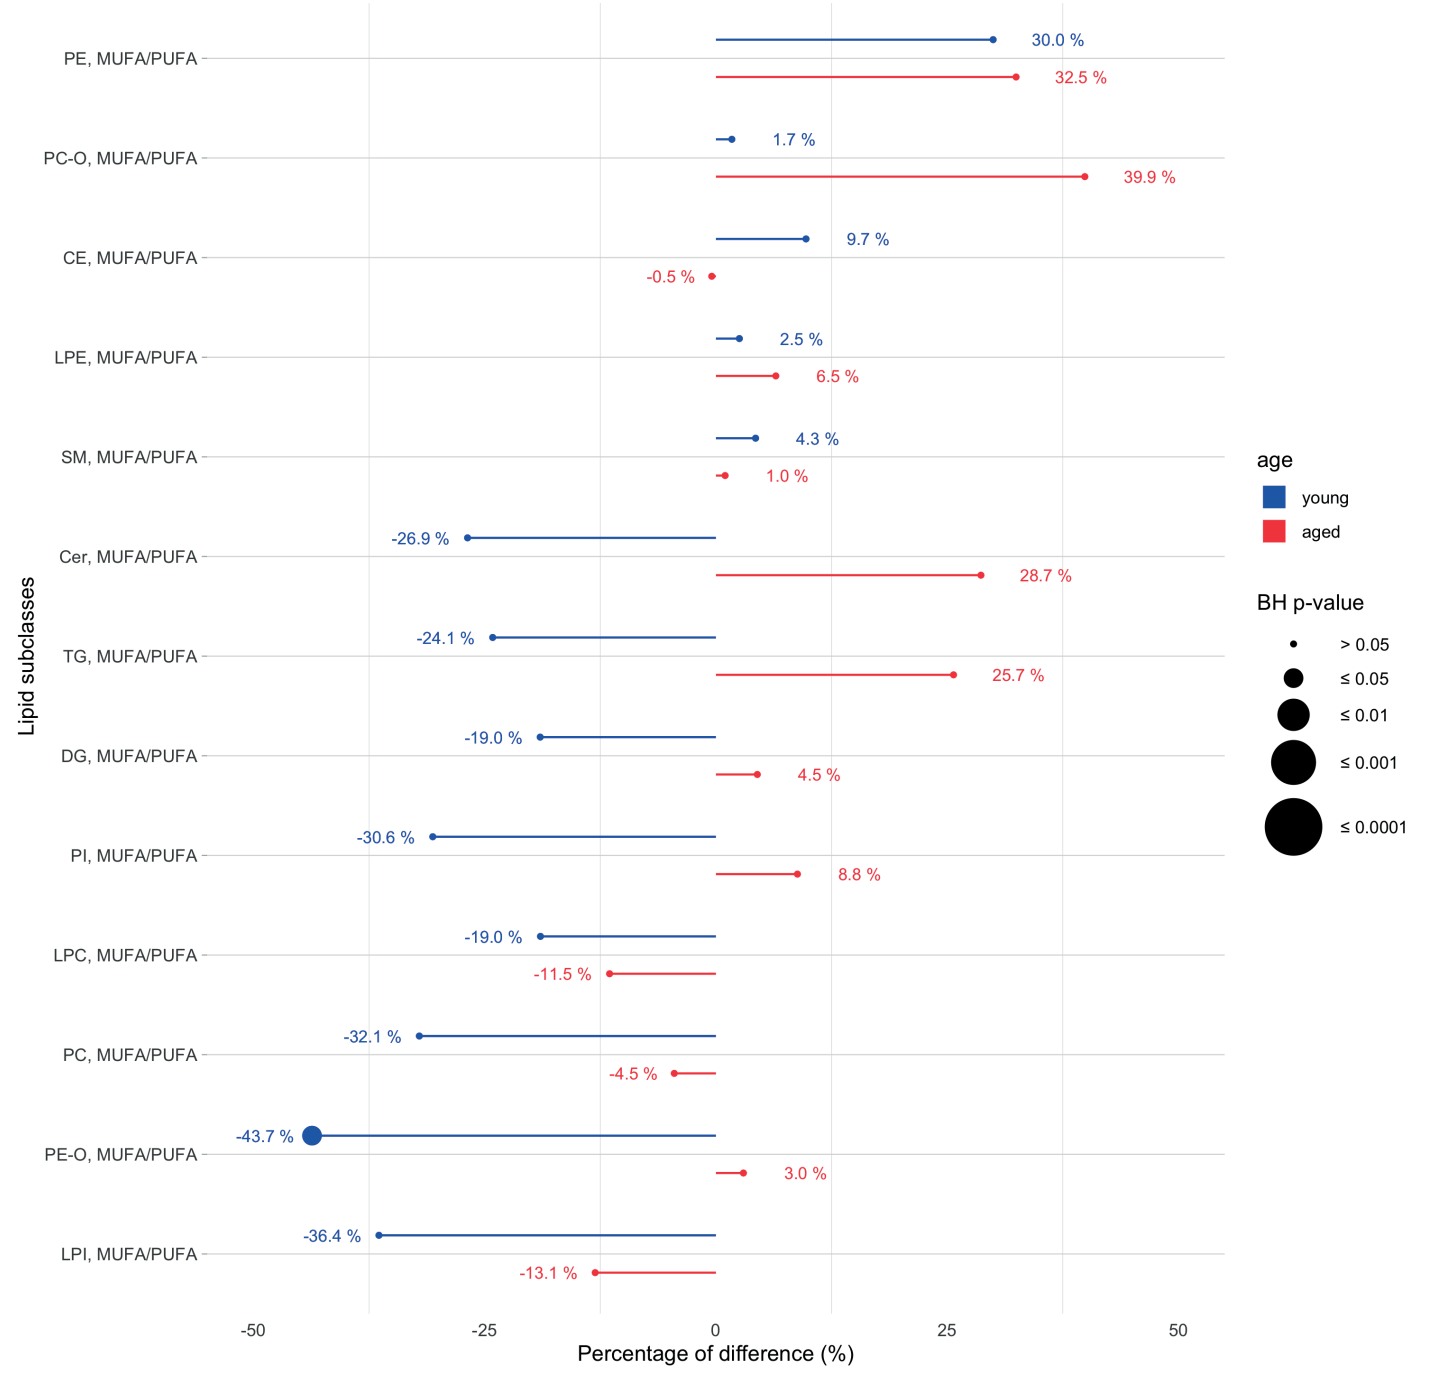

Supplement: s1 [file s1]

# A Young

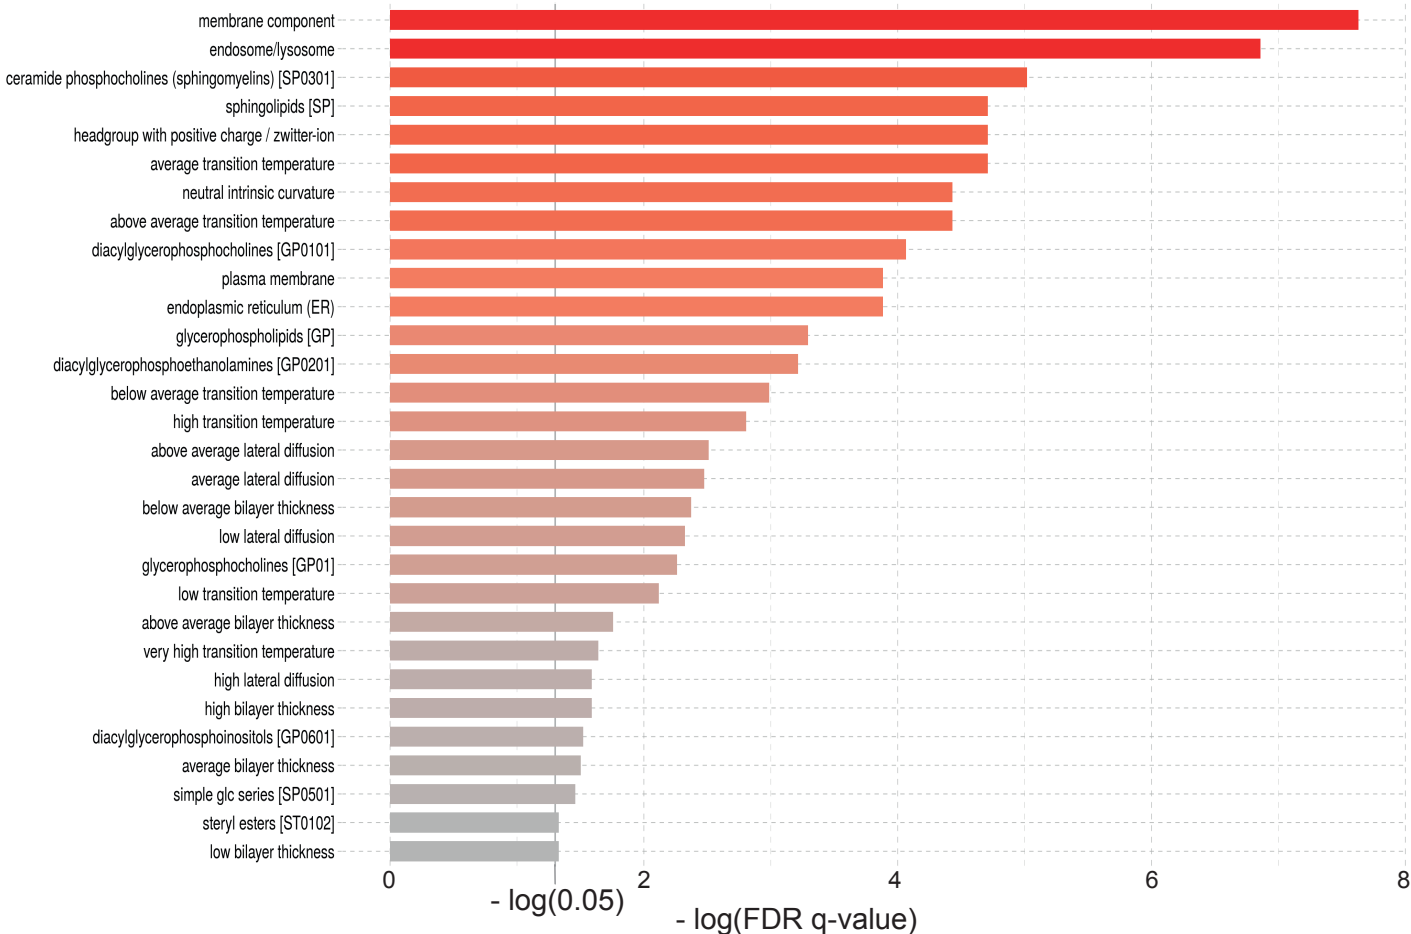

# B Aged

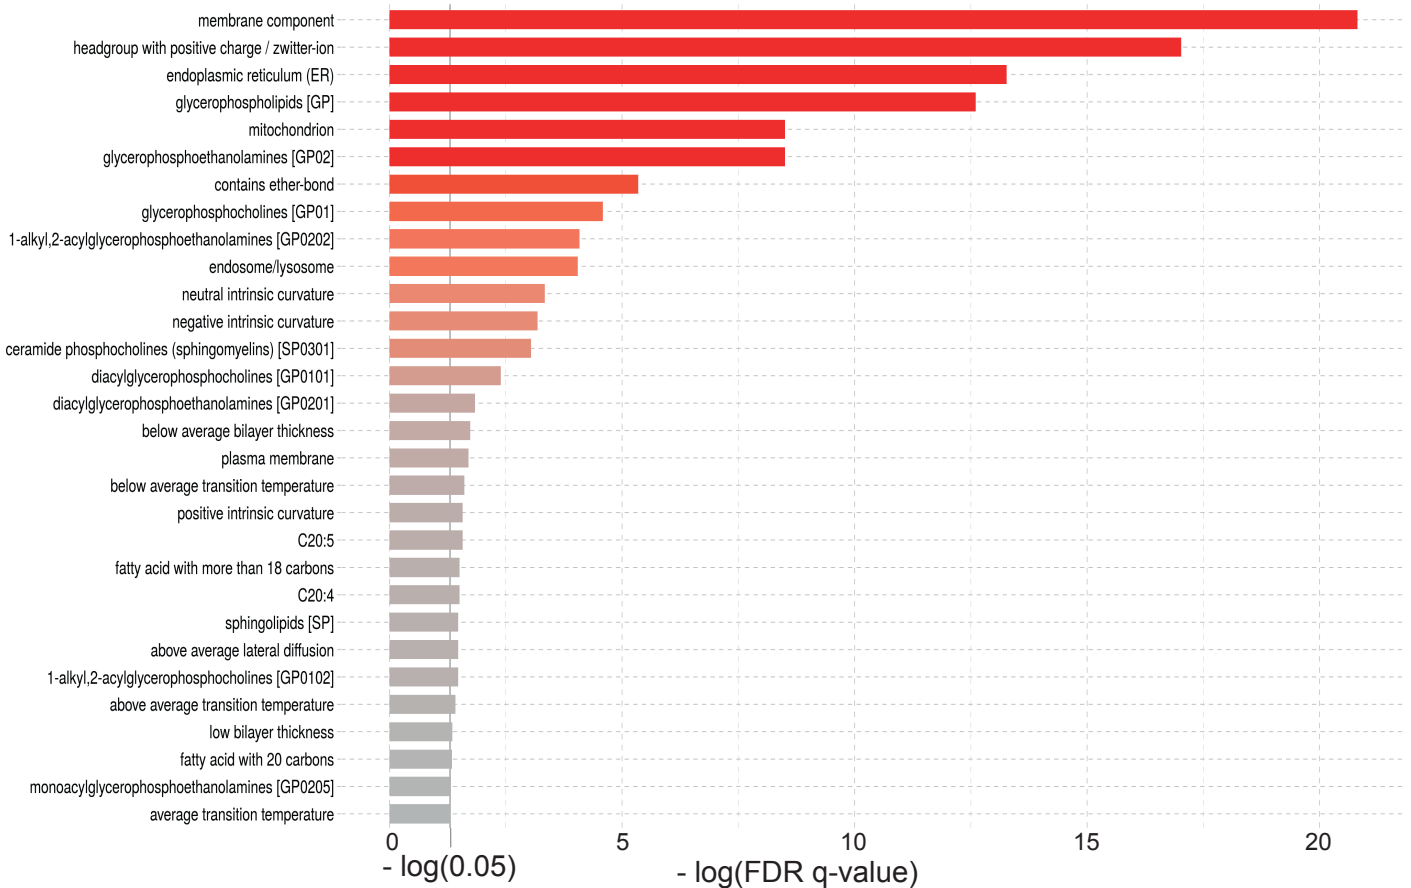

Supplement: s1 [file s1]

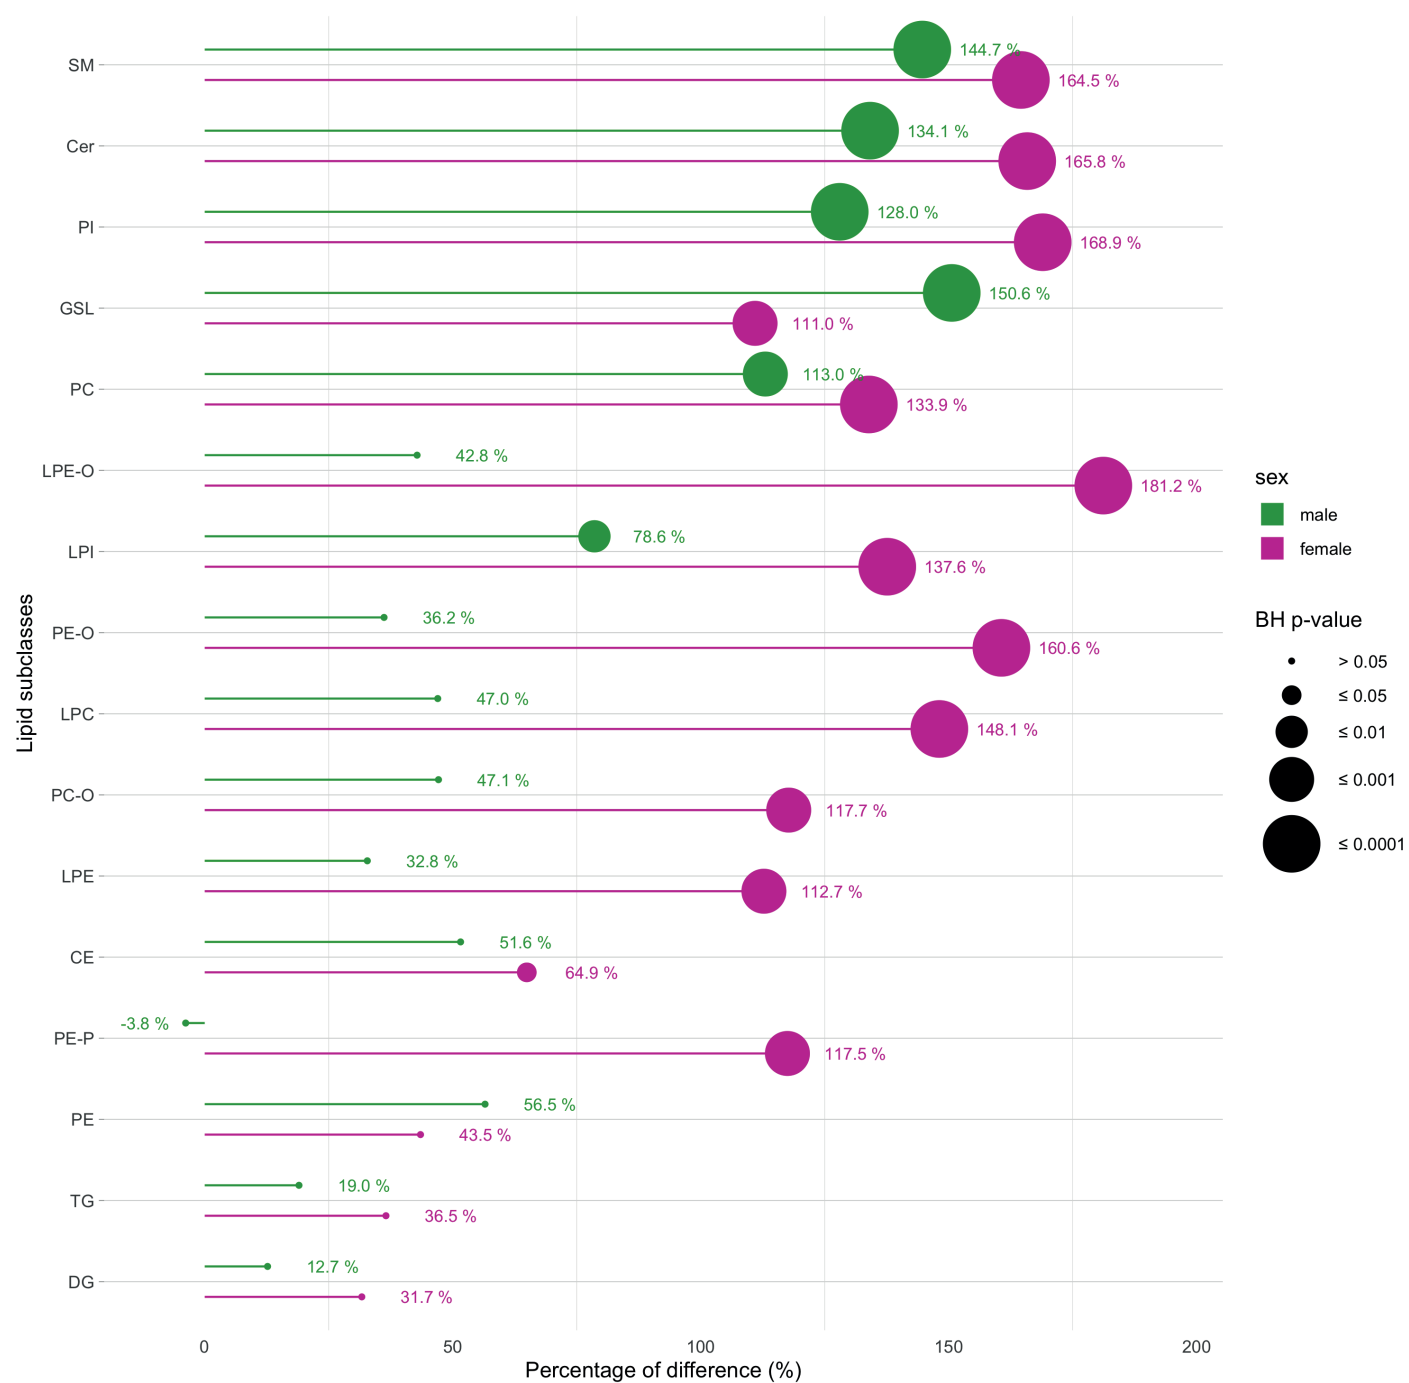

Supplement: s1 [file s1]

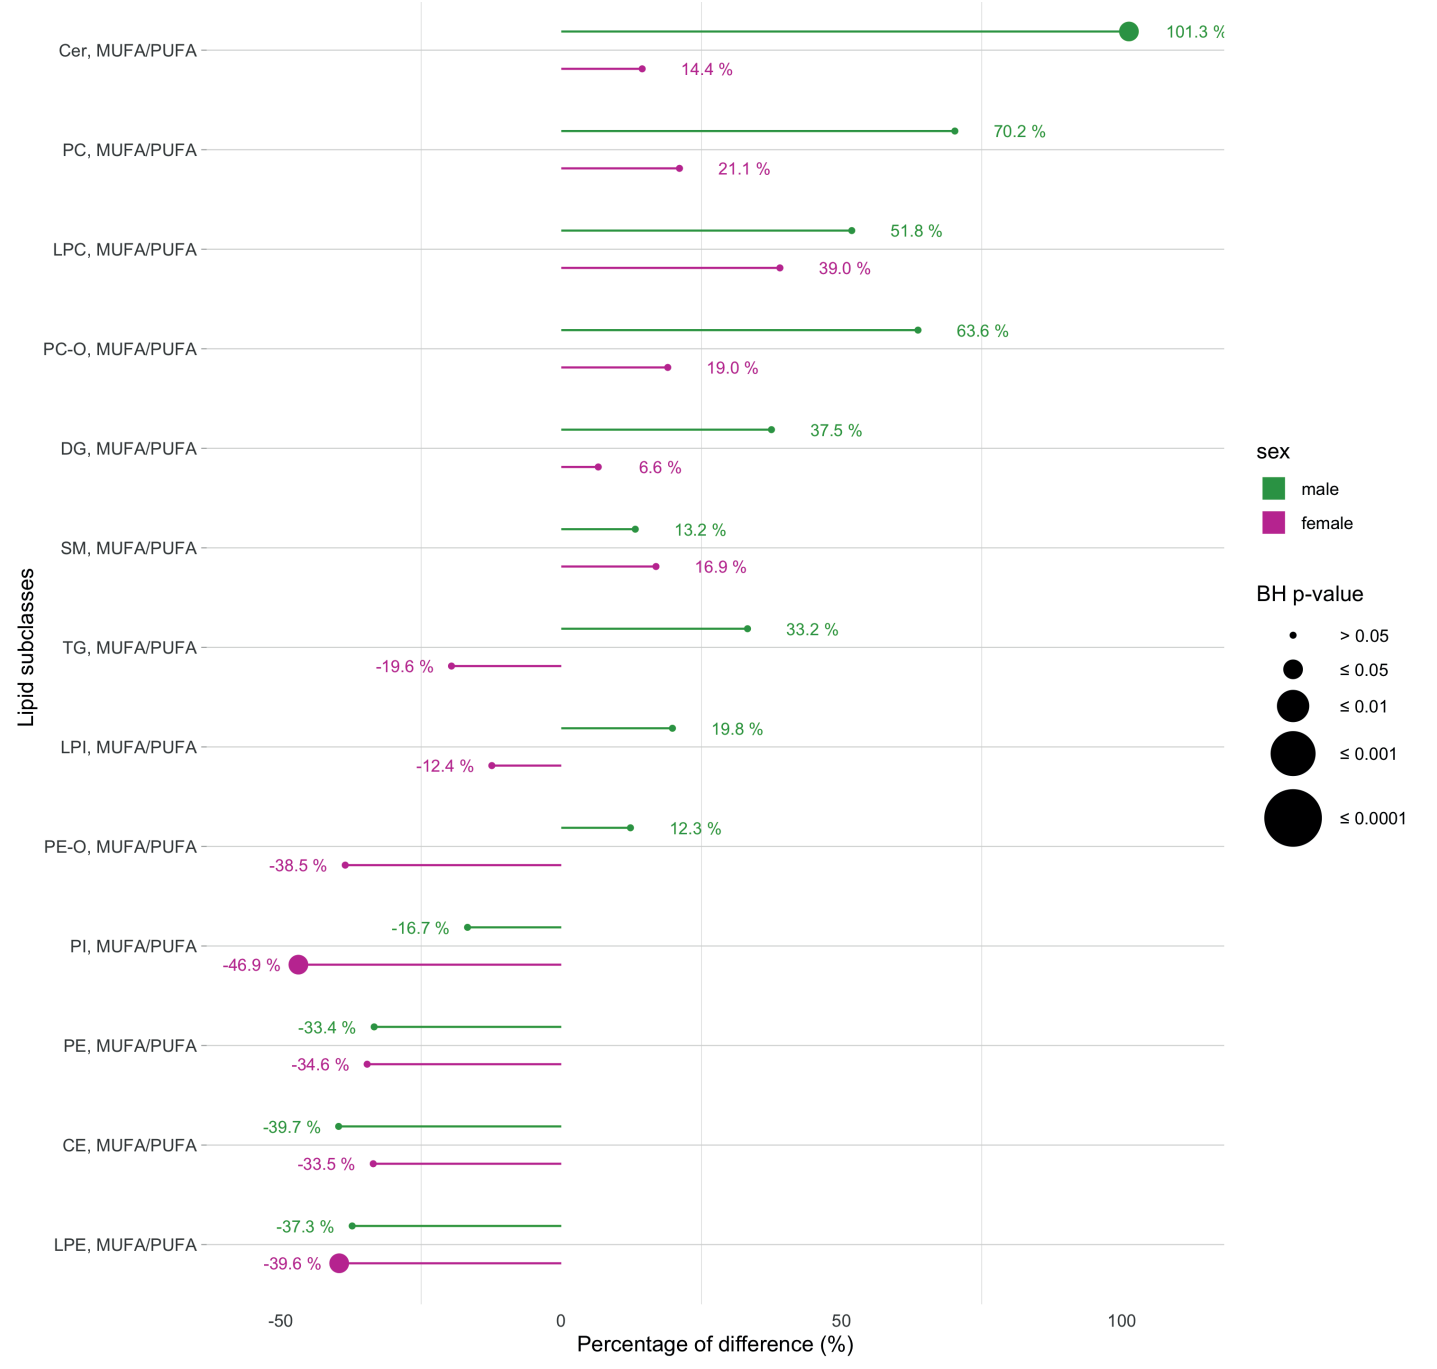

Supplement: s1 [file s1]

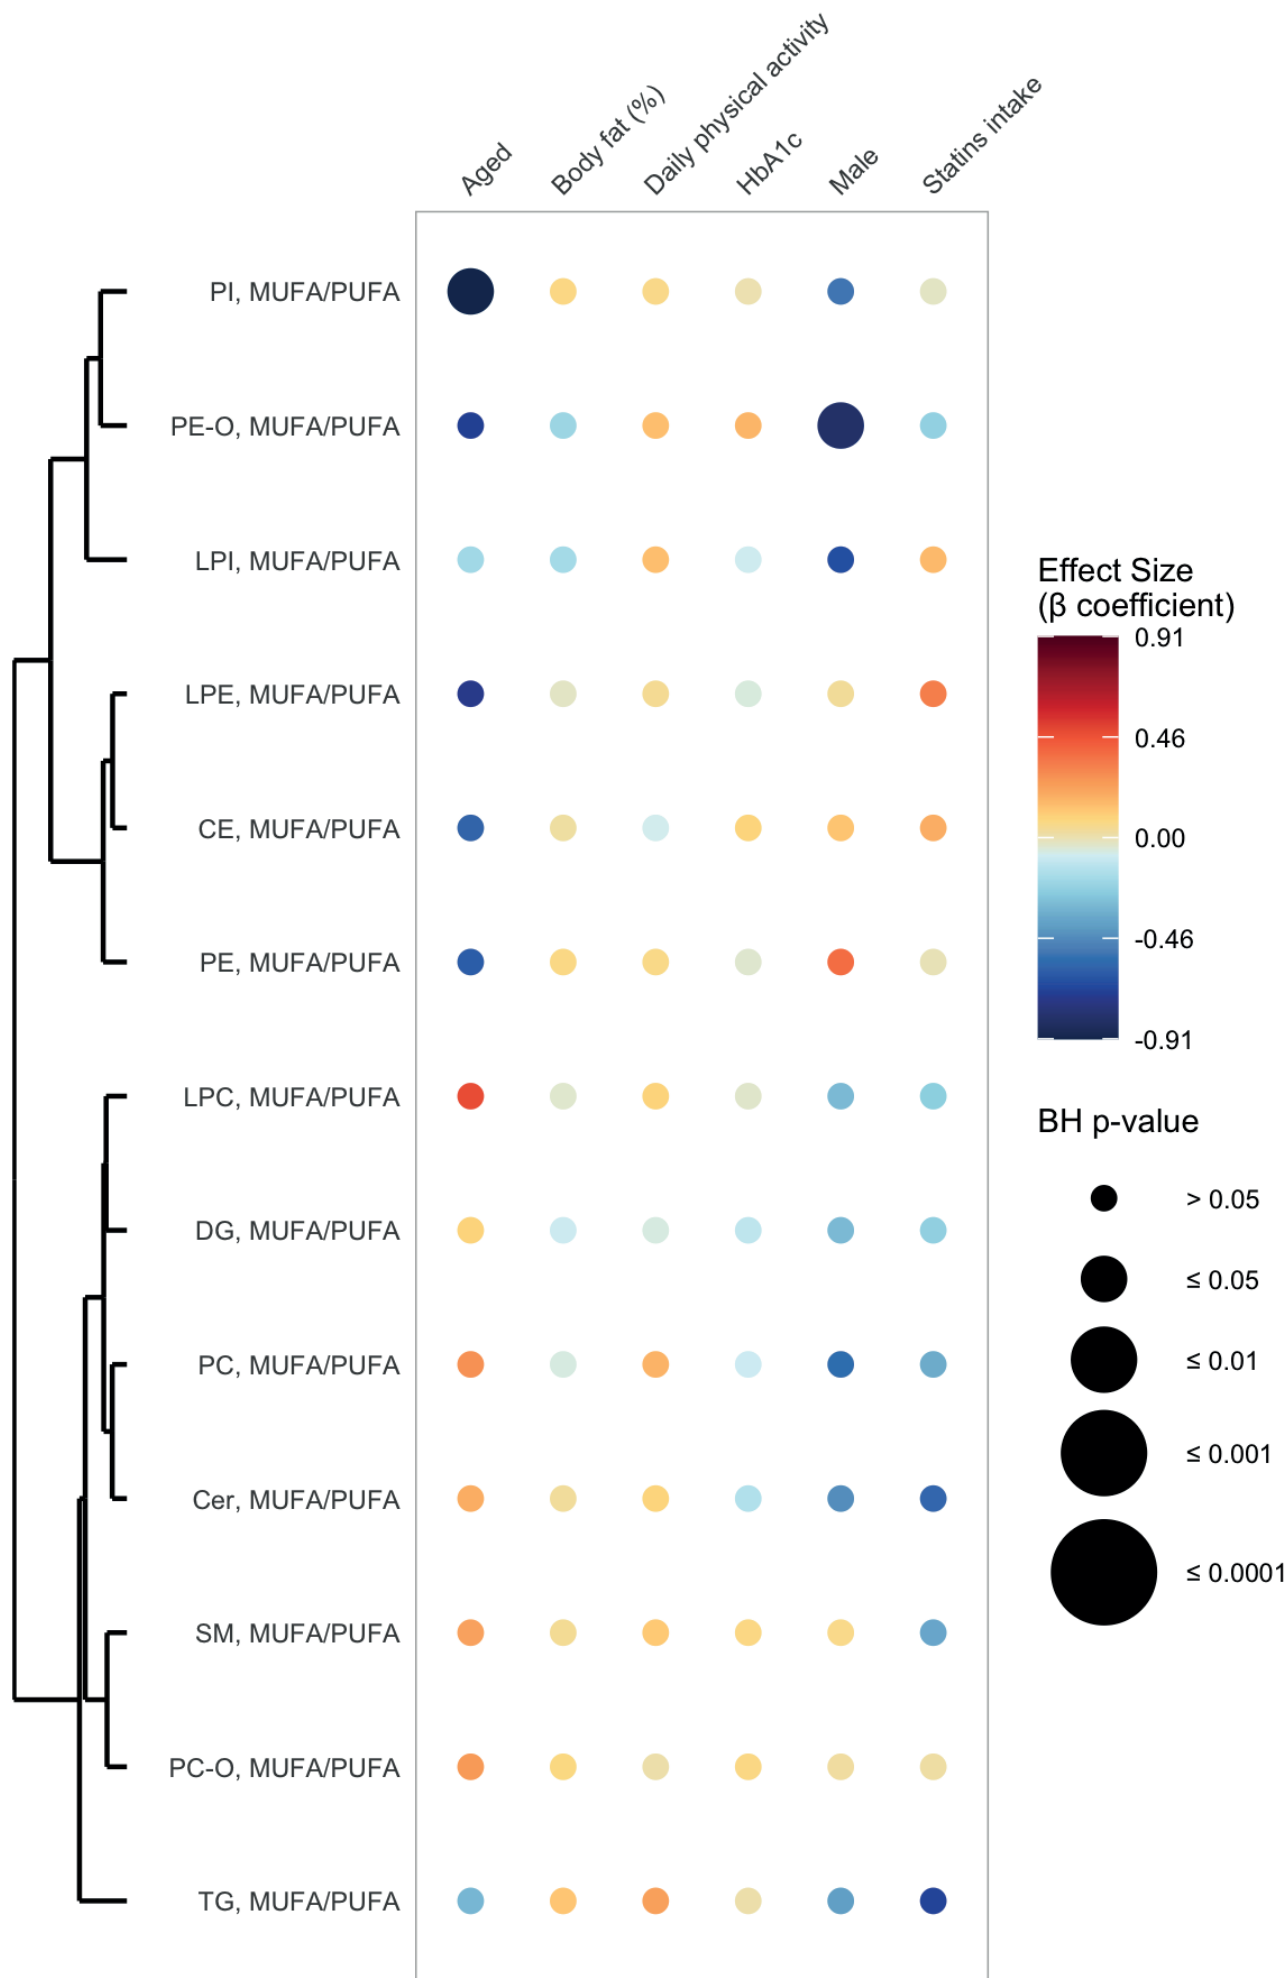

Supplement: s1 [file s1]

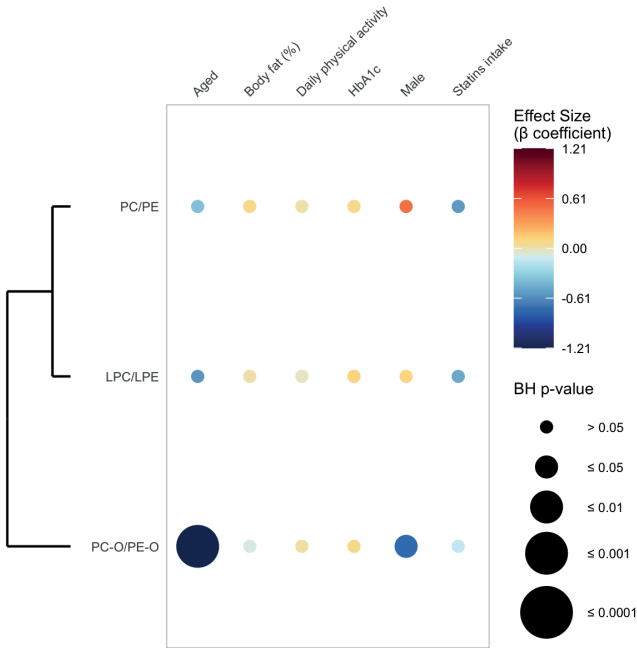

Supplement: s1 [file s1]

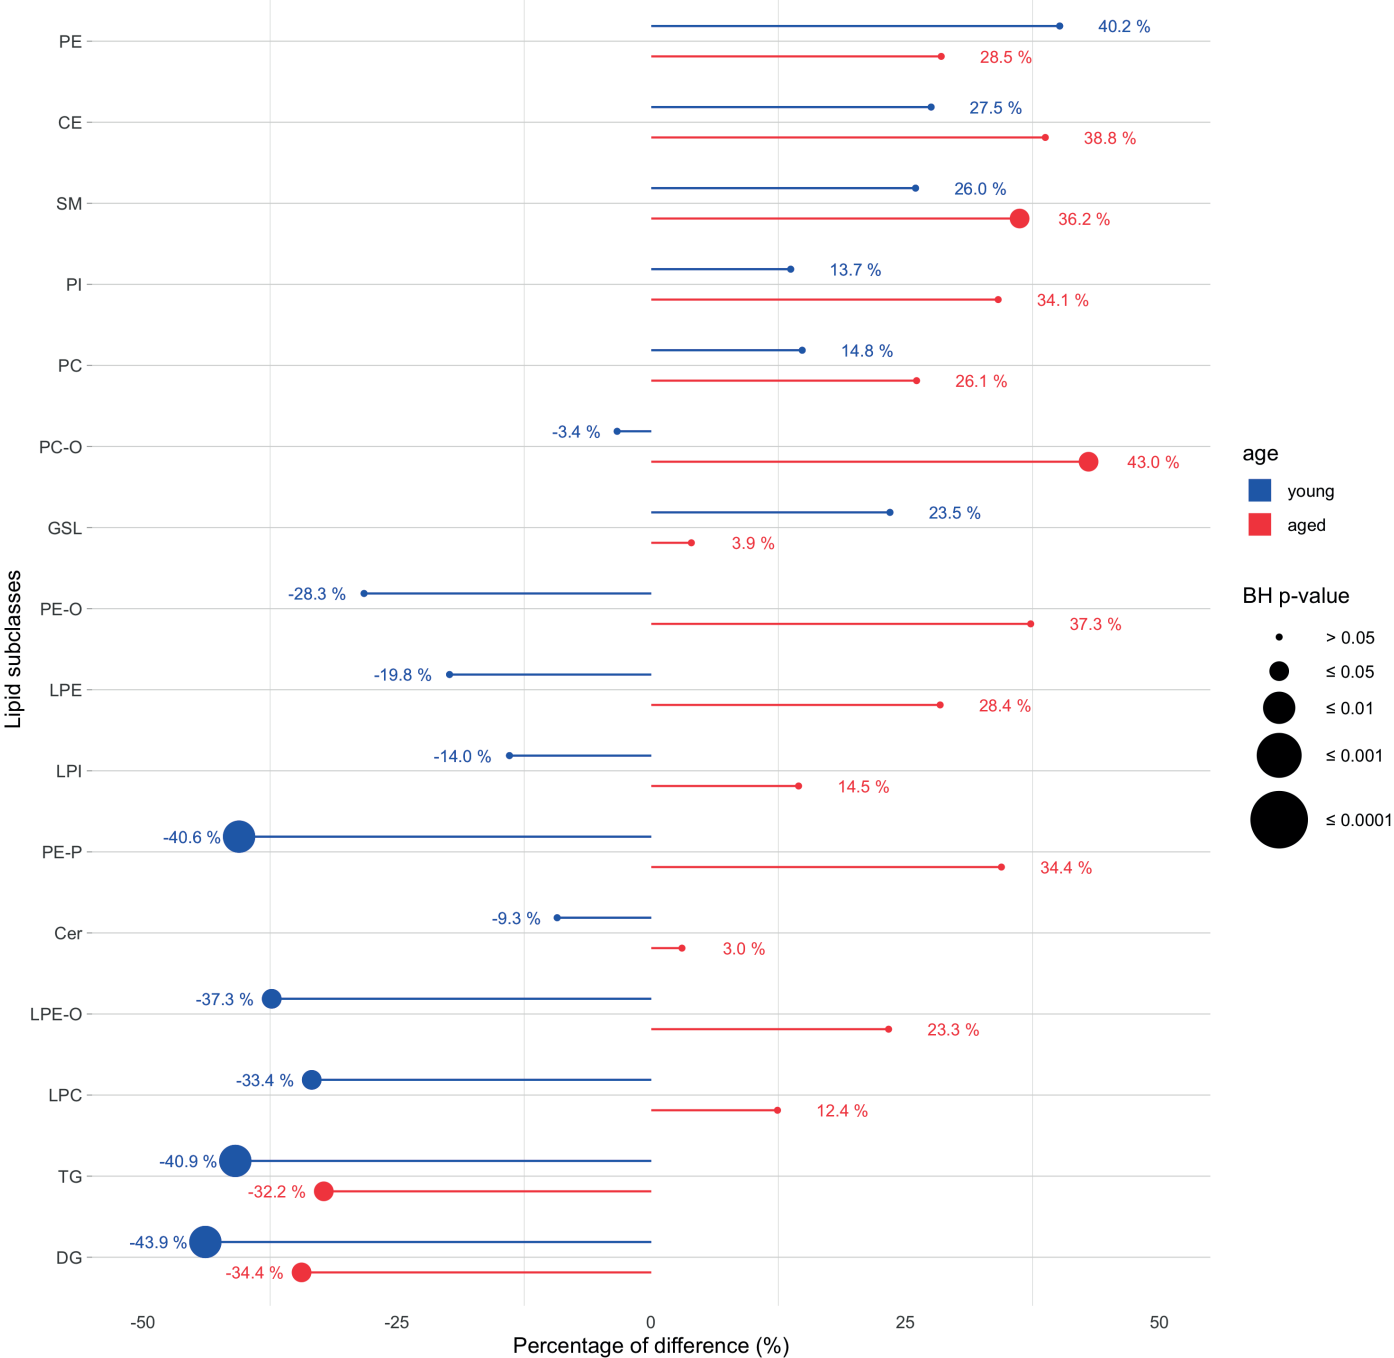

Supplement: s1 [file s1]

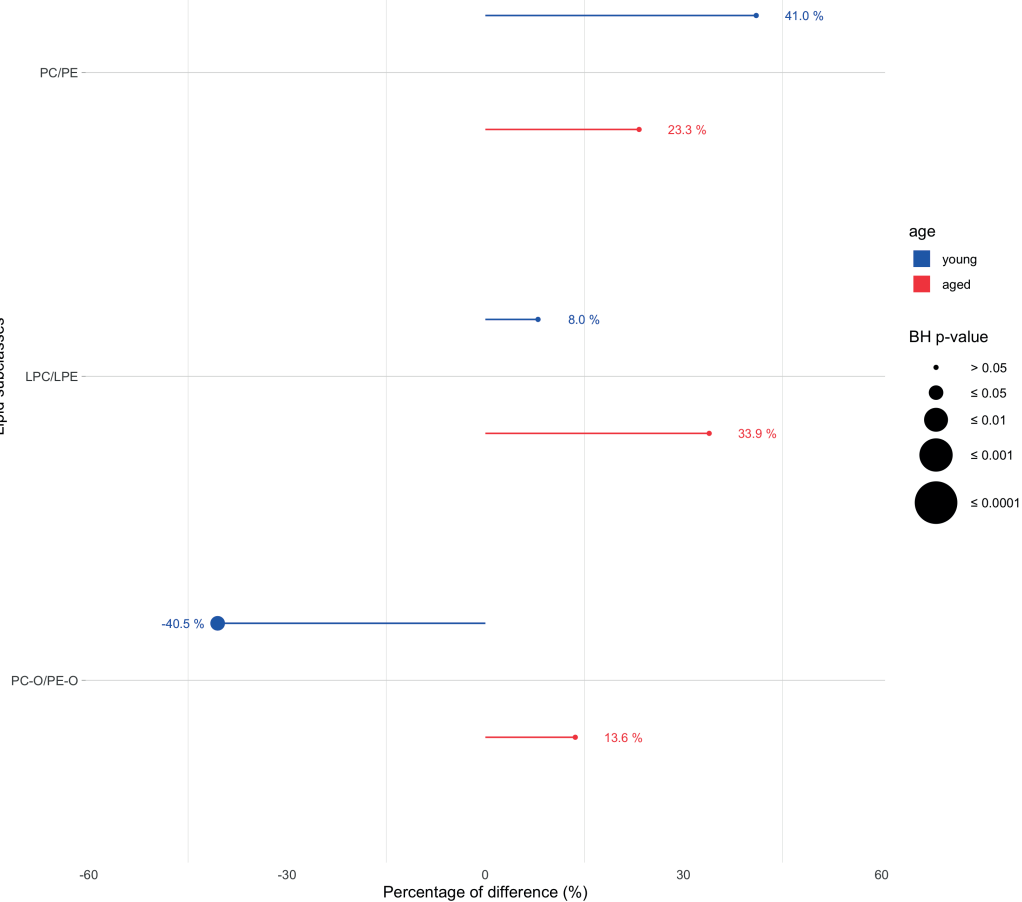

Supplement: s1 [file s1]

Lipid subclasses

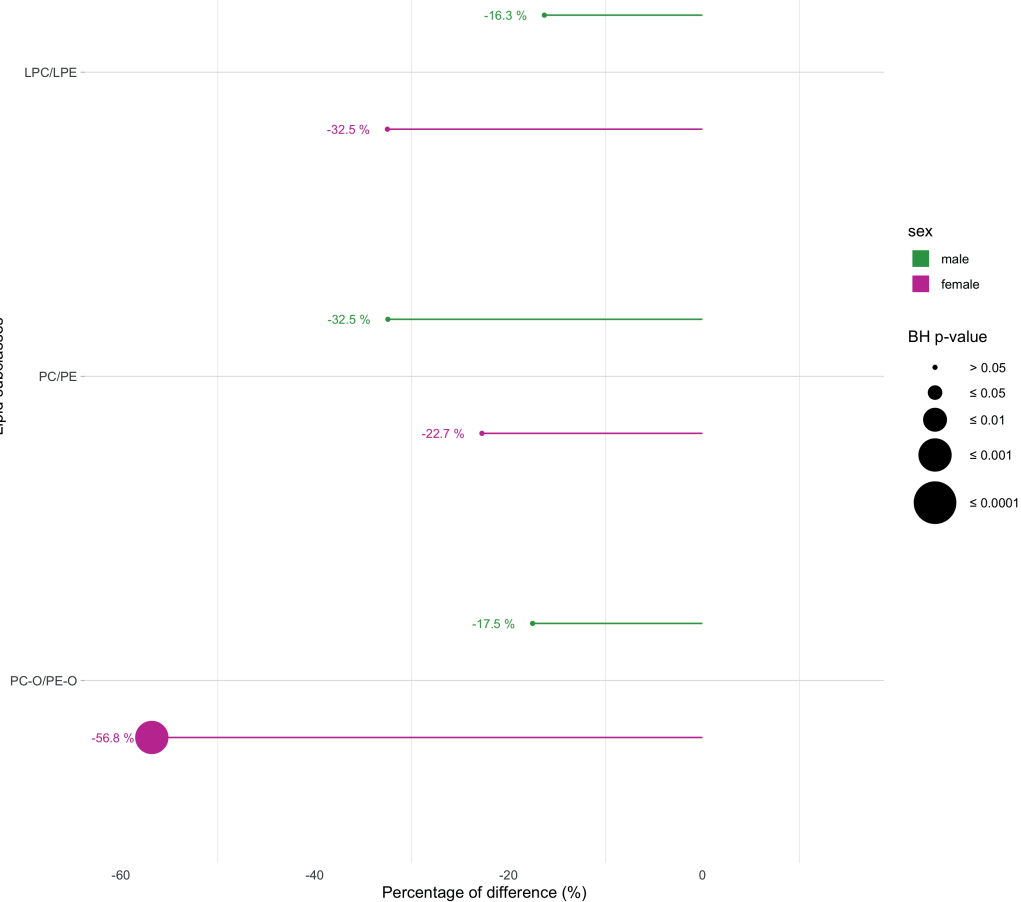

Supplement: s1 [file s1]

**A**

## Young

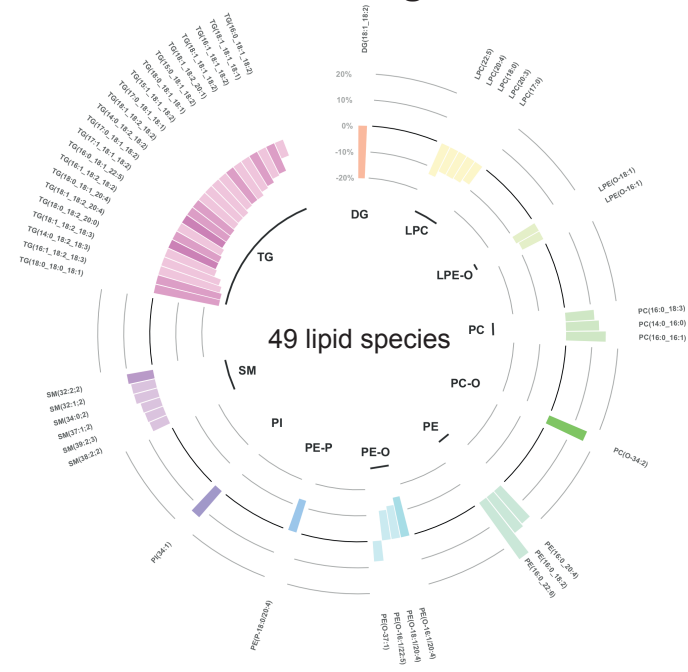

# B

## Aged

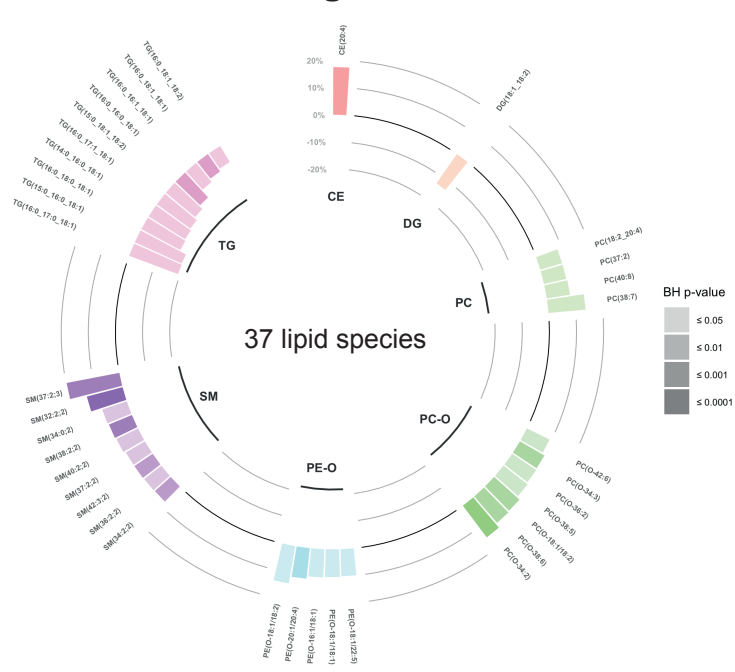

Supplement: s1 [file s1]
